# Supplementary material for: Inhibition of miR-16 enhances the sensitivity of fibroblast-like synovial cells to methotrexate by restraining MDR1/P-gp expressionviaNF-κB pathway
Source: Royal Society of Chemistry journal article supplement (doi:10.1039/c9ra04991f), 2019-01-01
Supplement: c9ra04991f1.pdf [file c9ra04991f1.pdf]

Supplementary material:

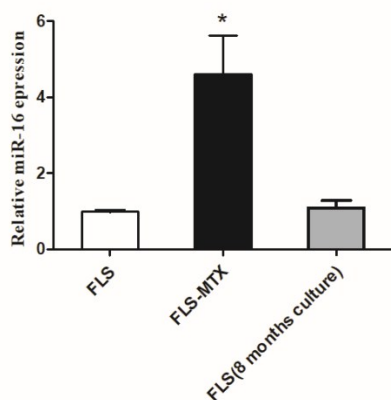

Fig S1: The miR-16 expression was measured in FLS, FLS (8 months culture) and FLS-MTX cell. There was no significant difference in miR-16 and expression between the FLS cells used in this study and FLS cells cultured for 8 months.
